# Supplementary material for: Phosphorylation and Dephosphorylation of Tau Protein During Synthetic Torpor
Source: PubMed Central journal article supplement (PMC6563845; doi:10.3389/fnana.2019.00057), 2019-06-06

**Figure S1.** Representative pictures showing the scoring correspondence to the staining intensity observed (Alexa-594): from “-“ (no staining) to “++++” (maximum staining observed). Pictures represent the medial mammillary nuclei stained for AT8. This method was also used for Tau-1 staining. Calibration bar: 100µm.

**Staining intensity scoring**

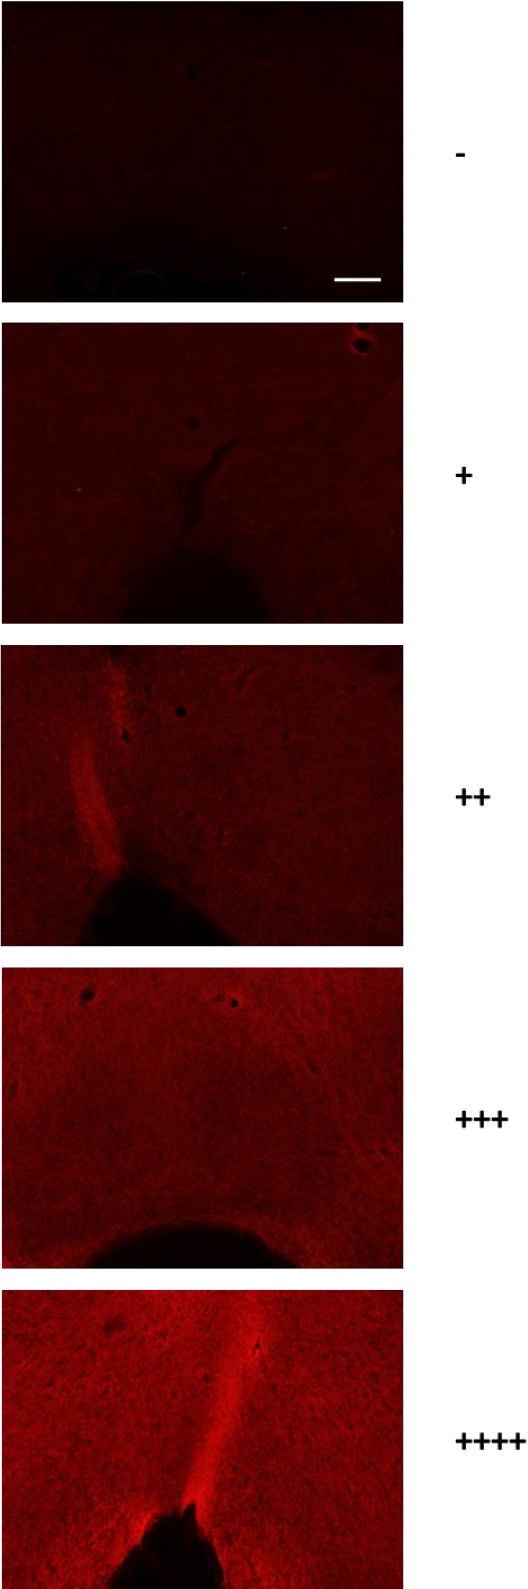

**Figure S2.** Representative pictures showing microglia, stained with Iba1 (secondary conjugated with Alexa-488). Pictures represent the CA3 field of the hippocampus. C, control ( $1.9\pm 0.2$  cells/ $100\mu\text{m}^2$ ); N, sample taken at nadir of hypothermia, during the ST ( $2.5\pm 0.2$  cells/ $100\mu\text{m}^2$ ); R6, sample taken 6h after  $35.5\text{ }^\circ\text{C}$  brain temperature (Tb) was reached ( $5.8\pm 0.4$  cells/ $100\mu\text{m}^2$ ); R38, sample taken 38h after reaching  $35.5\text{ }^\circ\text{C}$  Tb ( $4.8\pm 0.1$  cells/ $100\mu\text{m}^2$ ). Calibration bar:  $50\mu\text{m}$ .

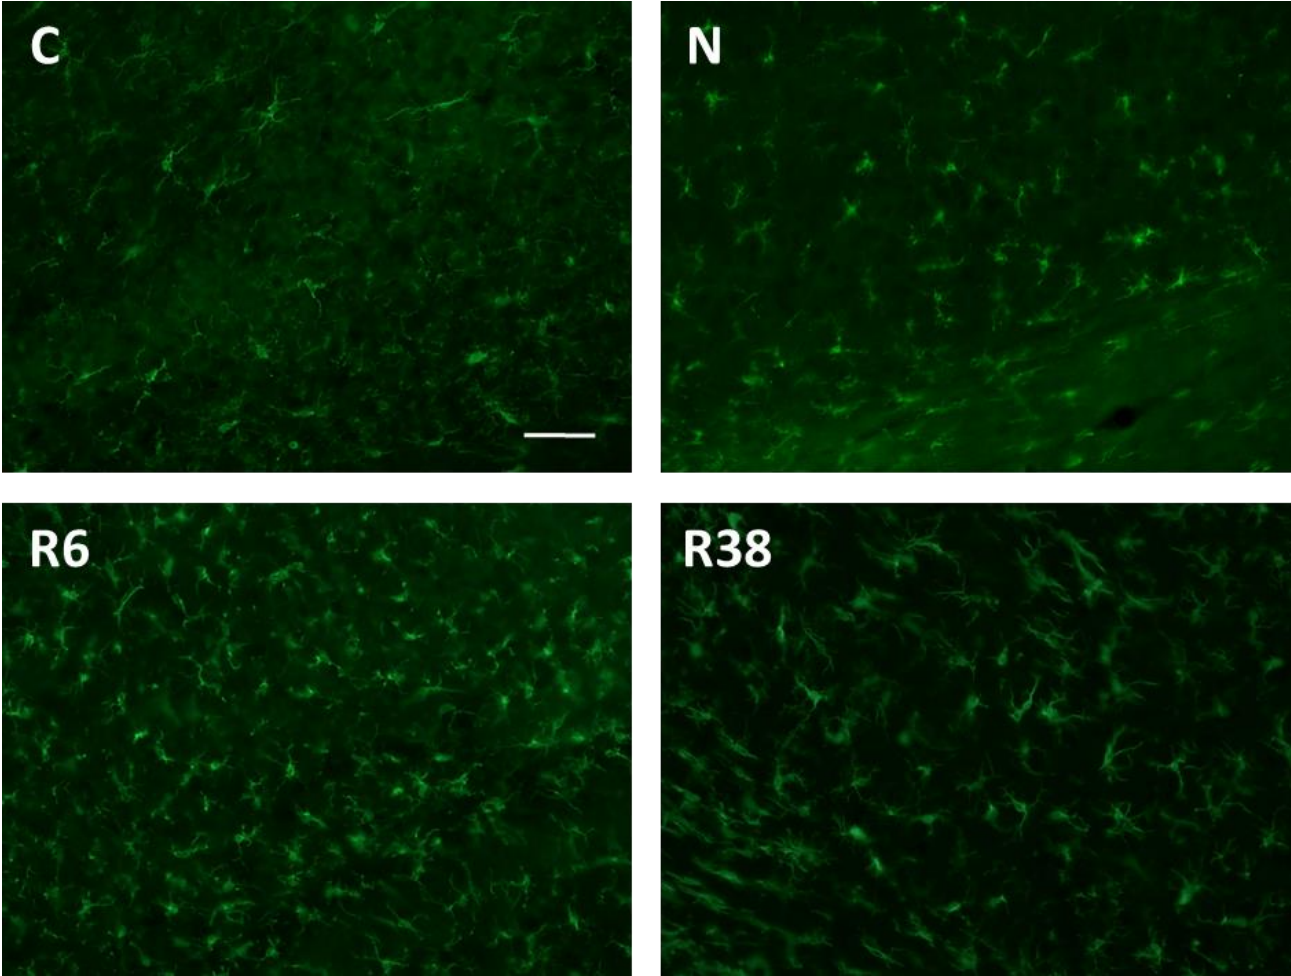

Supplement: Data_Sheet_1.pdf [file Data_Sheet_1.pdf]
